# Supplementary material for: Apathy, Novelty Processing, and the P3 Potential in Parkinson’s Disease
Source: PubMed Central journal article supplement (PMC4917554; doi:10.3389/fneur.2016.00095), 2016-06-23
Supplement: Image_1.pdf [file Image_1.pdf]

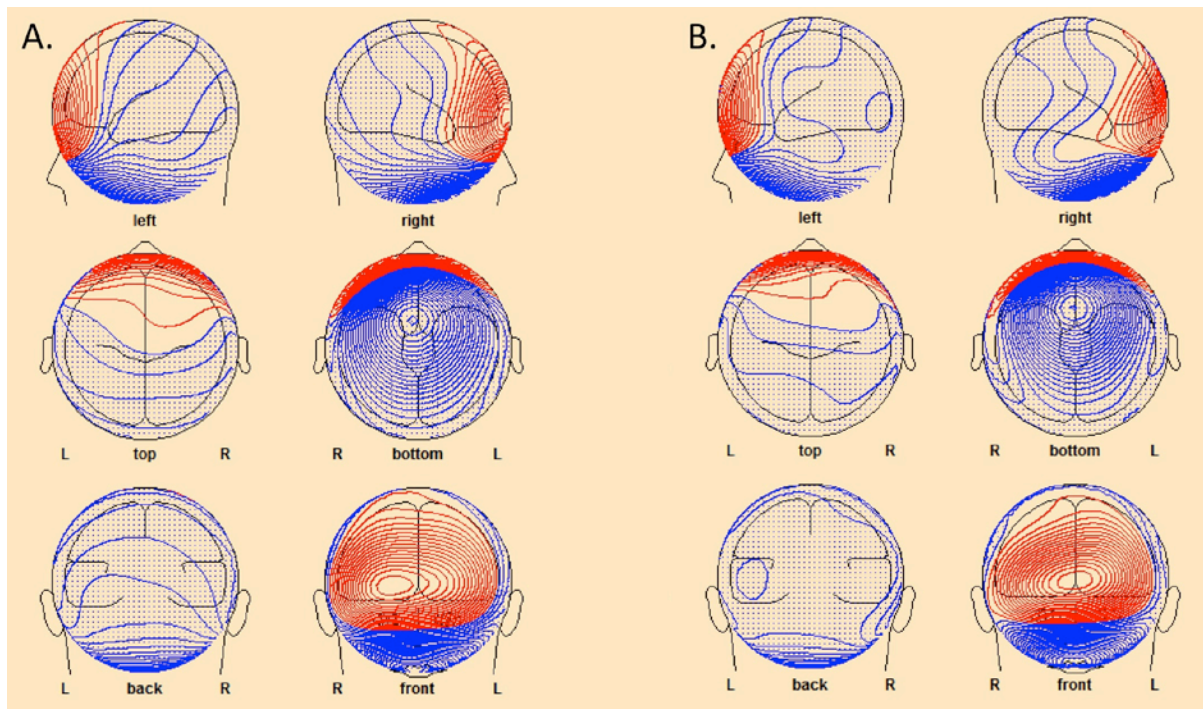

**FIGURE S1 | Scalp maps illustrating the PCA topography of blink artifacts, as revealed by spatial filtering methods. (A) Sample control participant's blink artifact. (B) Sample PD patient's blink artifact. Note: blink patterns were associated with a large frontal positivity (red) that was picked up by frontal face and scalp electrodes.**
